# Supplementary material for: Arterial Obstruction on Computed Tomographic or Magnetic Resonance Angiography and Response to Intravenous Thrombolytics in Ischemic Stroke
Source: PubMed Central journal article supplement — Stroke. 2017 Jan 23;48(2):353–60. doi: 10.1161/STROKEAHA.116.015164 (PMC5266422; doi:10.1161/strokeaha.116.015164), 2017-01-23
Supplement: str-48-353-s002.pdf [file str-48-353-s002.pdf]

## Acknowledgement Permission Form

Journal Stroke  
Manuscript No. STROKE/2016/015164  
First author Grant Mair  
Title of work Arterial obstruction on CT or MR angiography and response to intravenous thrombolytics in ischemic stroke

### Acknowledgement Permission:

Authors must provide written permission/approval from all individuals mentioned by name in the Acknowledgements section of a submitted manuscript. By signing this form, any and all acknowledged persons therefore state that they have read and approved the mention of their names in the Acknowledgement section of the aforementioned paper.

Printed Name Stephen M Davis  
Signature   
Date 12 October, 2016

## Acknowledgement Permission Form

Journal Stroke  
Manuscript No. STROKE/2016/015164  
First author Grant Mair  
Title of work Arterial obstruction on CT or MR angiography and response to intravenous thrombolytics in ischemic stroke

### Acknowledgement Permission:

Authors must provide written permission/approval from all individuals mentioned by name in the Acknowledgements section of a submitted manuscript. By signing this form, any and all acknowledged persons therefore state that they have read and approved the mention of their names in the Acknowledgement section of the aforementioned paper.

Printed Name Mark W Parsons

Signature 

Date 12th October 2016

## Acknowledgement Permission Form

Journal Stroke  
Manuscript No. STROKE/2016/015164  
First author Grant Mair  
Title of work Arterial obstruction on CT or MR angiography and response to intravenous thrombolytics in ischemic stroke

### Acknowledgement Permission:

Authors must provide written permission/approval from all individuals mentioned by name in the Acknowledgements section of a submitted manuscript. By signing this form, any and all acknowledged persons therefore state that they have read and approved the mention of their names in the Acknowledgement section of the aforementioned paper.

Printed Name Geoffrey Donnan  
Signature   
Date 12th October 2016
